# Supplementary material
Source: publisher figshare collection journal article supplement (https://acs.figshare.com/ndownloader/files/5520149)

## Supplementary Information

# The Development of an Effective Synthetic Route of Belinostat

*Xuefei Bao, Dake Song, Xuejun Qiao, Xuan Zhao, Guoliang Chen\**

Key Laboratory of Structure-Based Drug Design & Discovery, Ministry of Education, Shenyang  
Pharmaceutical University, Shenyang 110016, China

### ANALYTICAL HPLC TEST METHOD

Column: Shimadzu Inertsil-SP C18 (5  $\mu$ m; 250 mm  $\times$  4.6 mm),

Flow Rate: 1.5 mL/min,

Oven Temp: 30  $^{\circ}$ C,

Inj. volume: 3  $\mu$ L,

Detection: 220 nm

Mobile Phase, solution A: 25 mM phosphate buffer, pH 3.5, solution B :acetonitrile.

Gradient elution was performed as shown in **Table S1**.

**Table S1.** Gradient Program

| time (min) | mobile phase A (%) | mobile phase B (%) |
|------------|--------------------|--------------------|
| 0          | 75                 | 25                 |
| 20         | 60                 | 40                 |
| 35         | 30                 | 70                 |
| 35         | 75                 | 25                 |
| 45         | 75                 | 25                 |

Figure S1. HPLC spectrum of Belinostat.

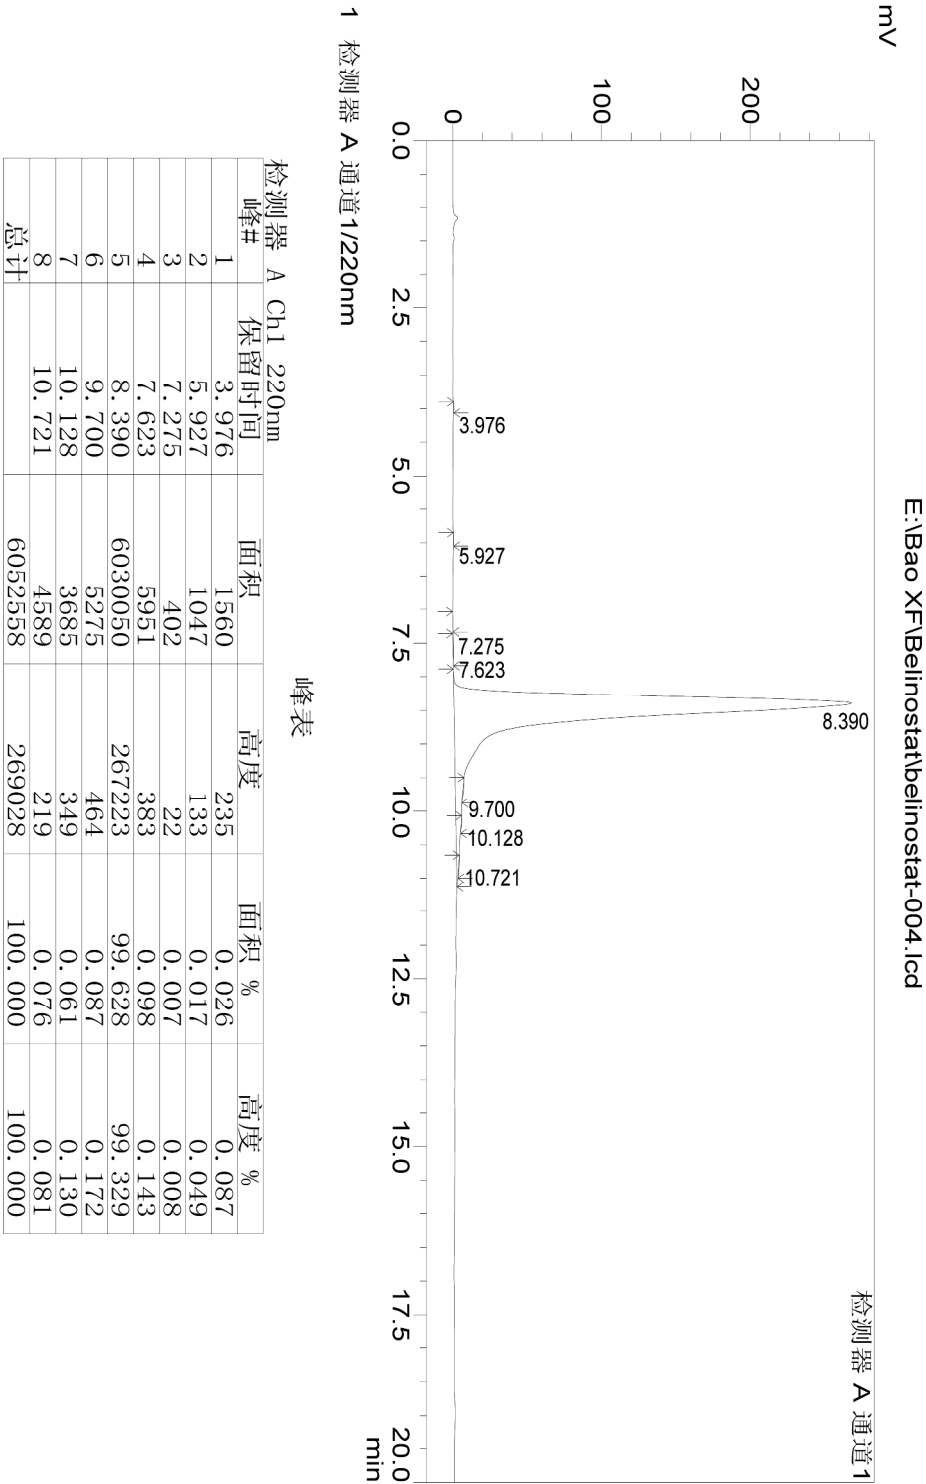

# <sup>1</sup>H NMR SPECTRA

**Figure S2.** <sup>1</sup>H NMR spectrum (400 MHz, DMSO-*d*<sub>6</sub>) of belinostat **1**.

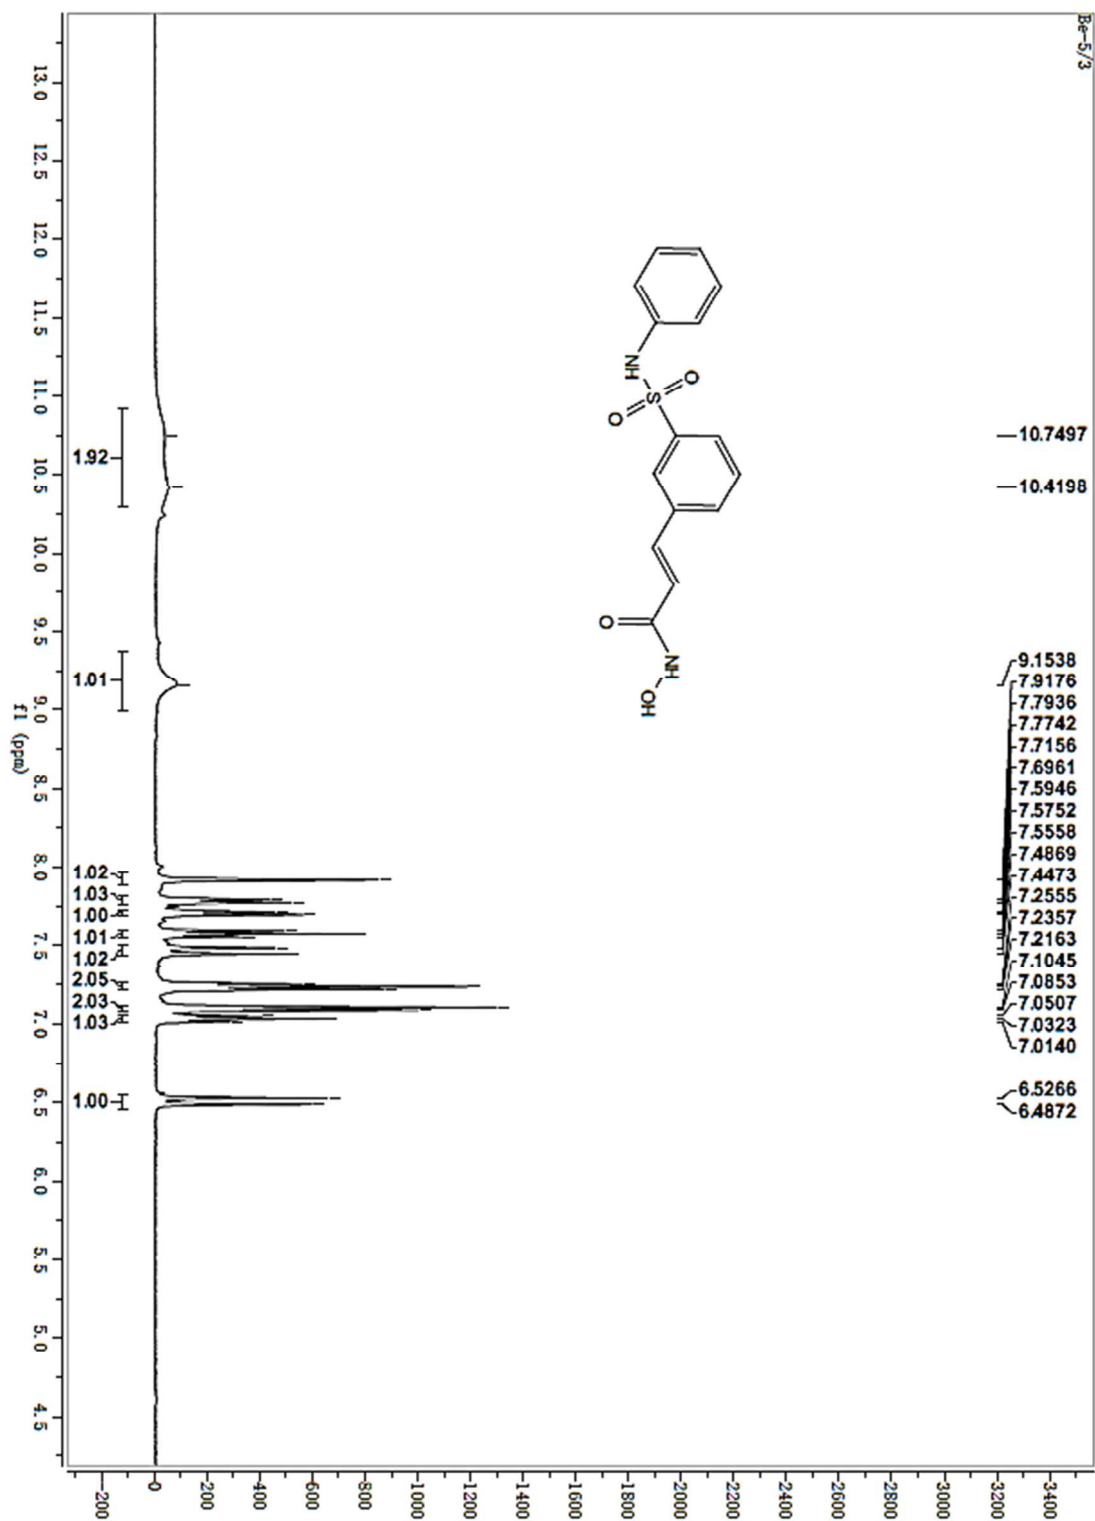

**Figure S3.**  $^1\text{H}$  NMR spectrum (400 MHz,  $\text{DMSO}-d_6$ ) of compound **6**.

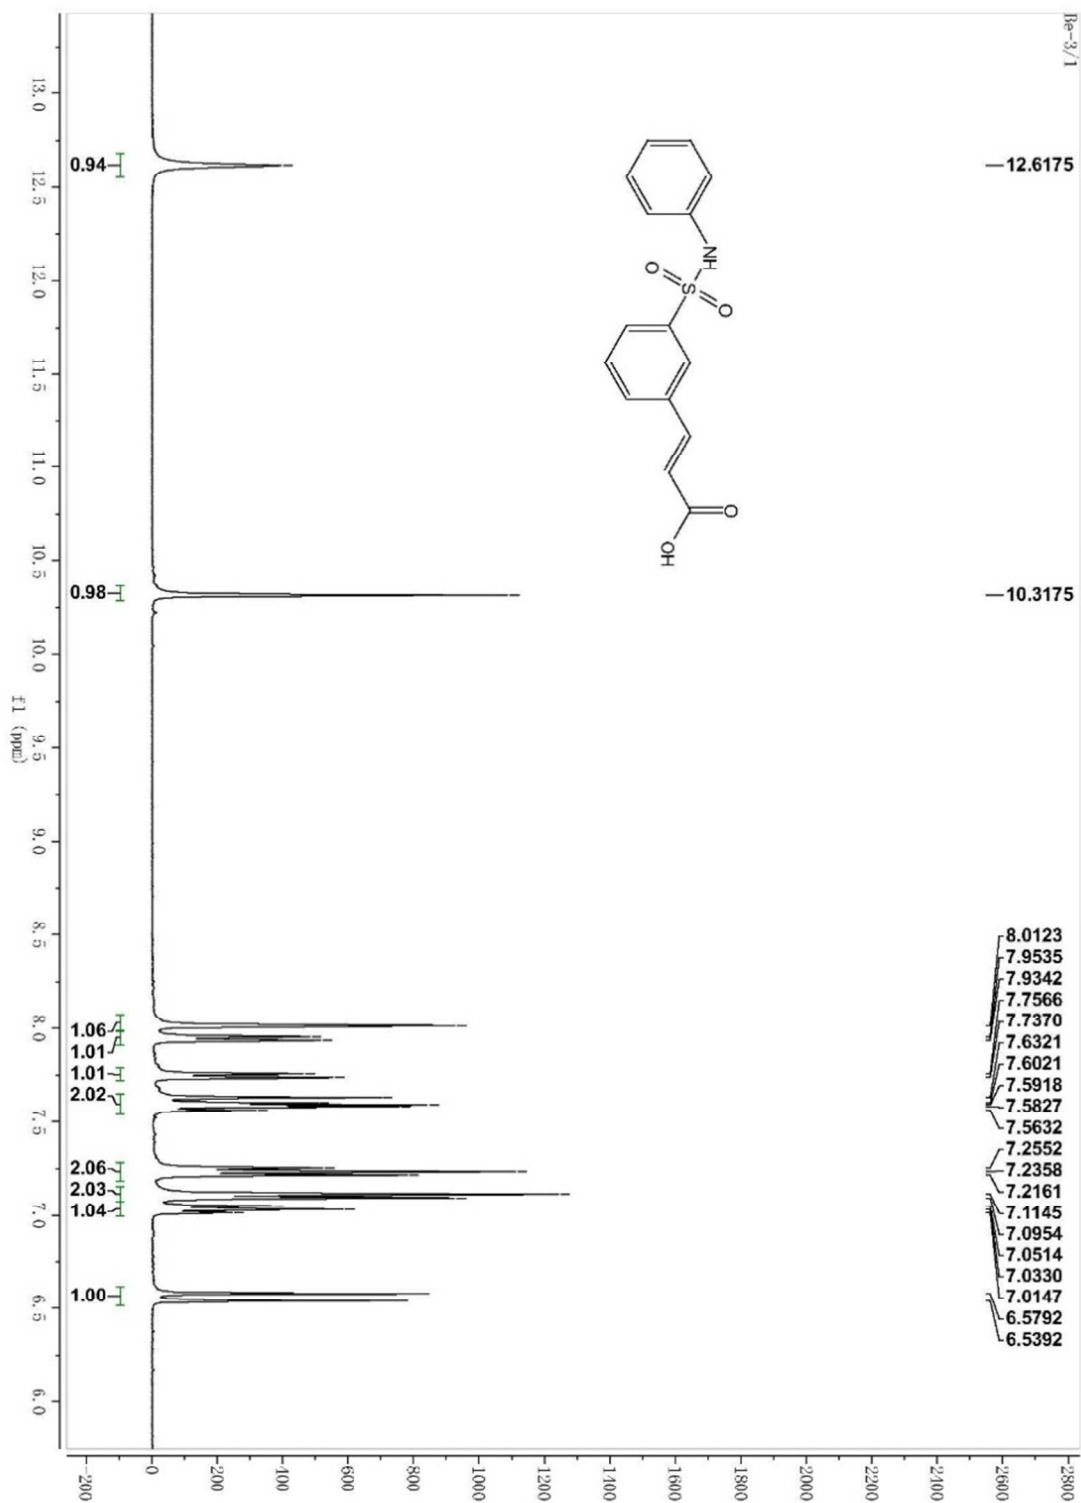

**Figure S4.**  $^1\text{H}$  NMR spectrum (400 MHz,  $\text{CDCl}_3$ ) of compound **5**.

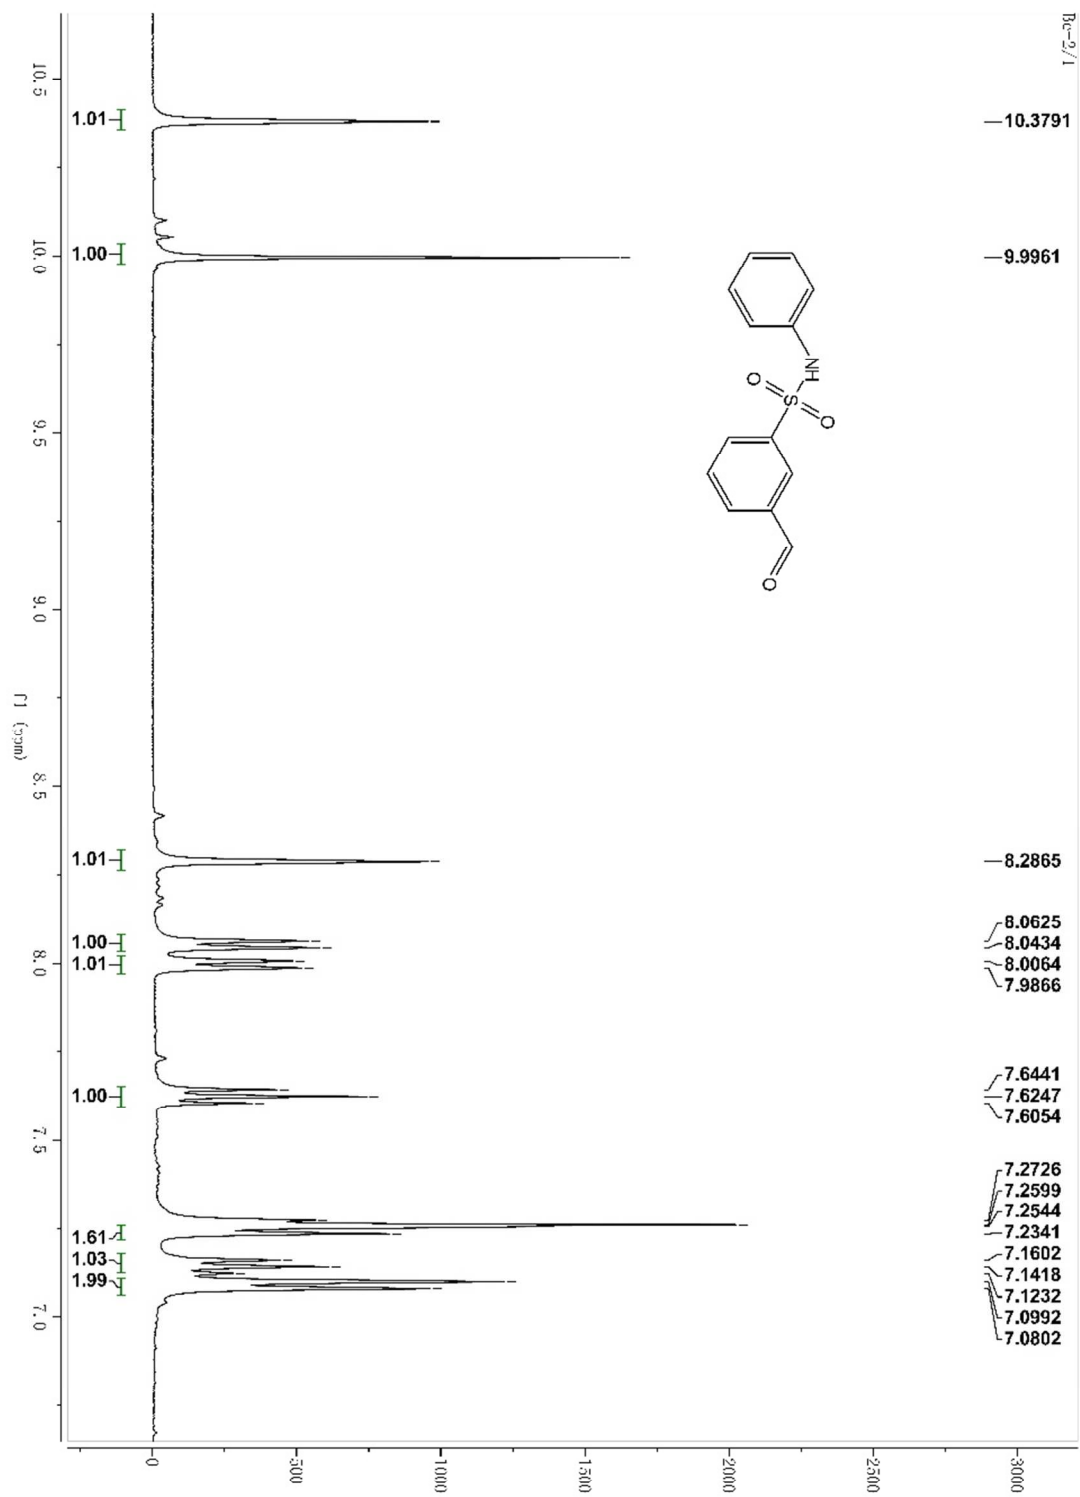

**Figure S5.**  $^1\text{H}$  NMR spectrum (400 MHz,  $\text{CDCl}_3$ ) of compound 4.

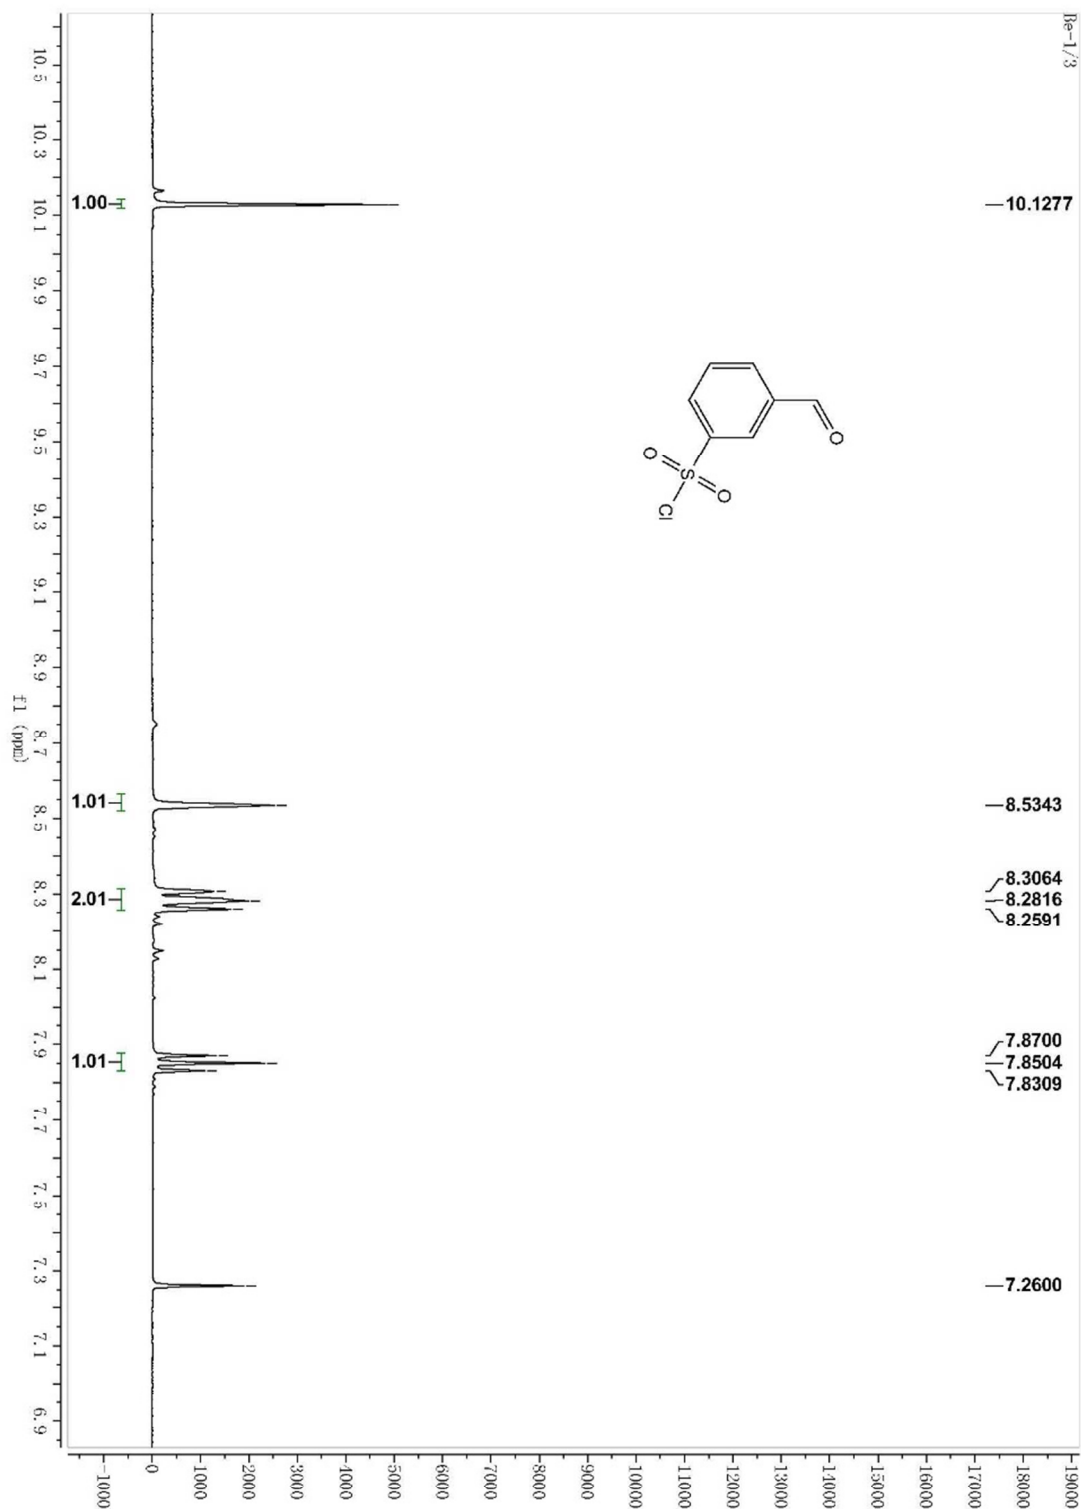

**Figure S6.**  $^1\text{H}$  NMR spectrum (400 MHz,  $\text{CDCl}_3$ ) of compound **7**.

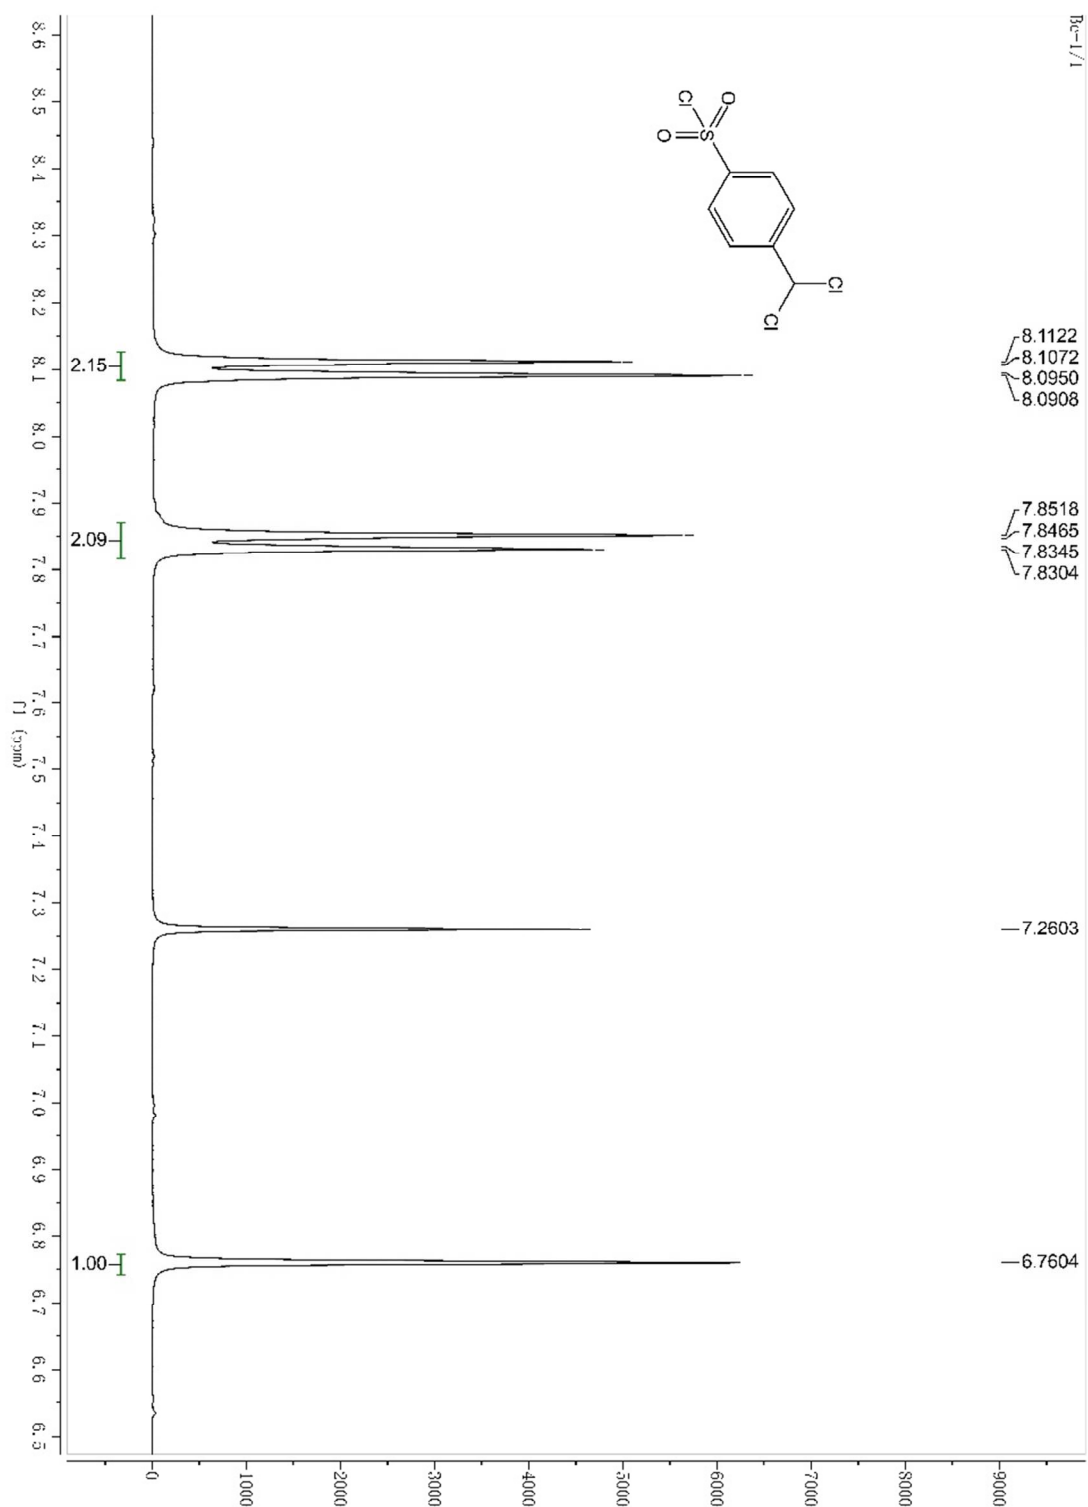

**Figure S7.**  $^1\text{H}$  NMR spectrum (400 MHz,  $\text{CDCl}_3$ ) of compound **8**.

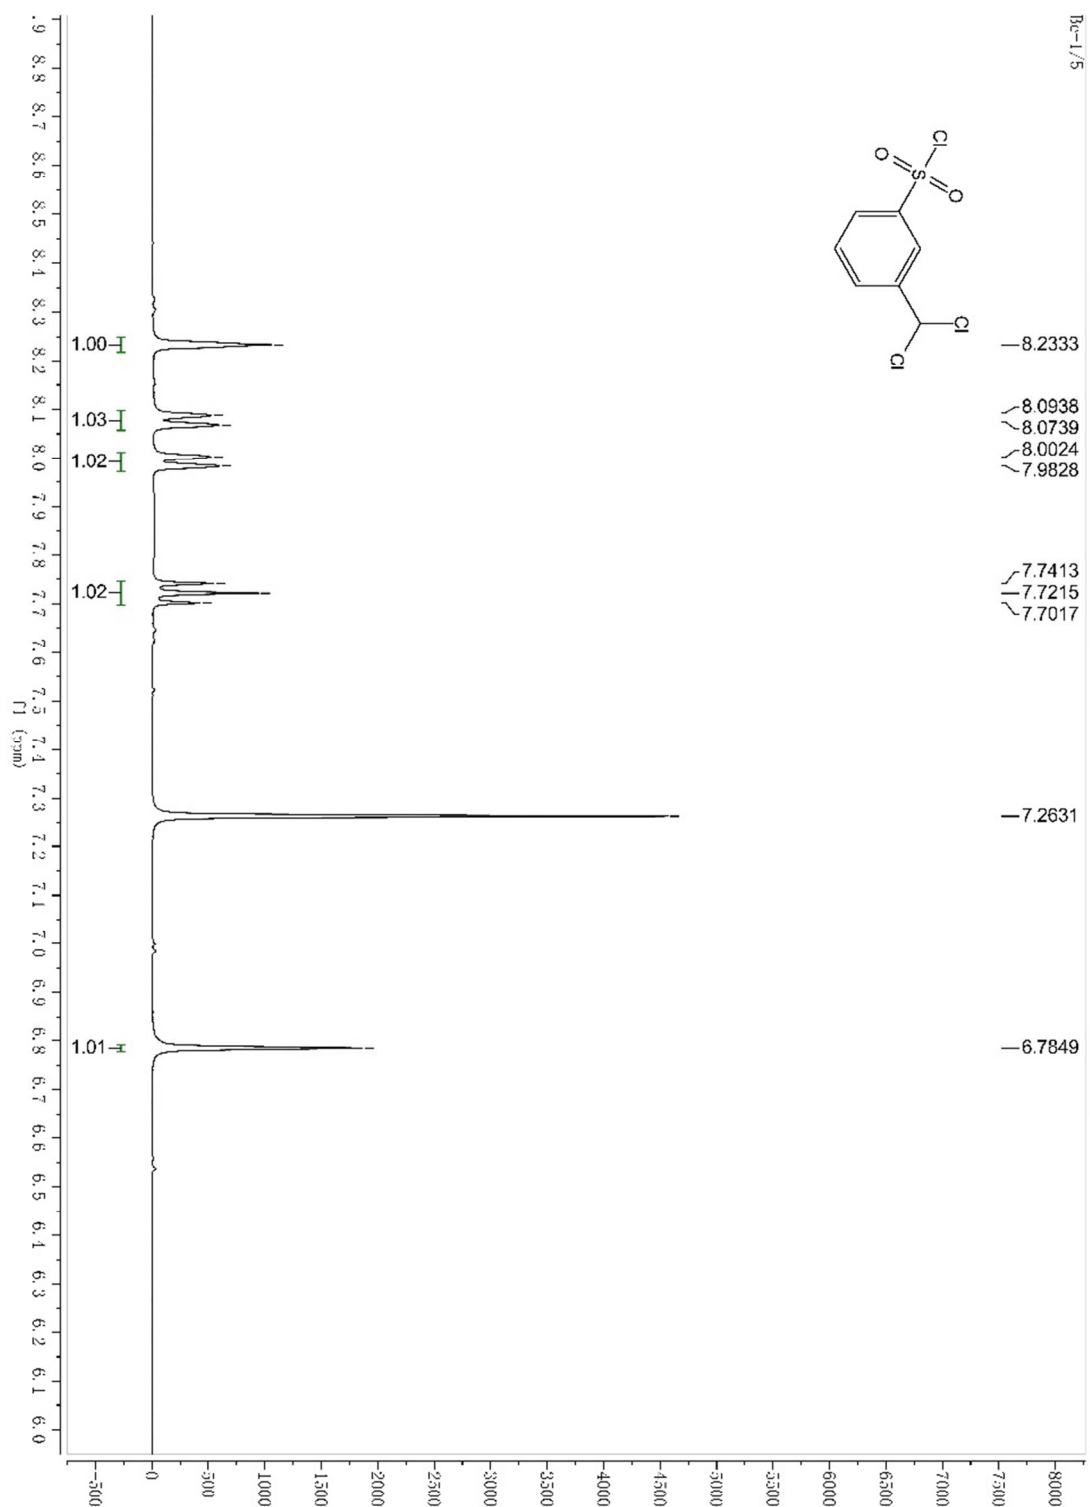



**Figure S8.**  $^1\text{H}$  NMR spectrum (400 MHz,  $\text{CDCl}_3$ ) of compound **11**.

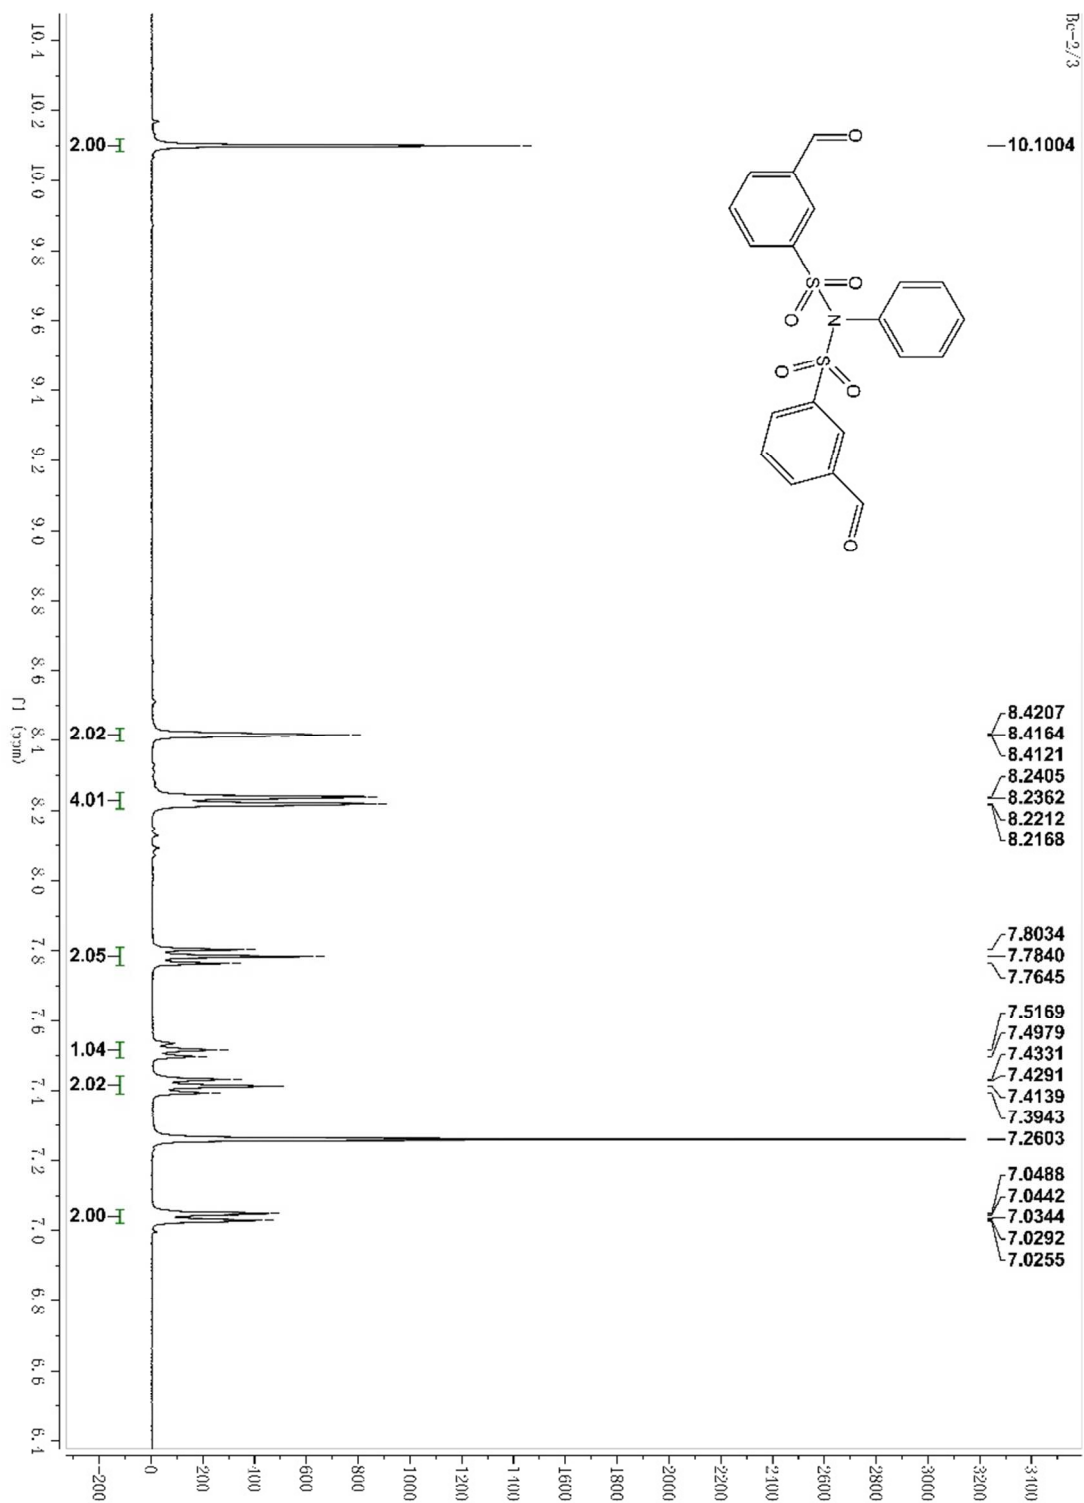

**Figure S9.**  $^1\text{H}$  NMR spectrum (400 MHz,  $\text{CDCl}_3$ ) of compound **10**.

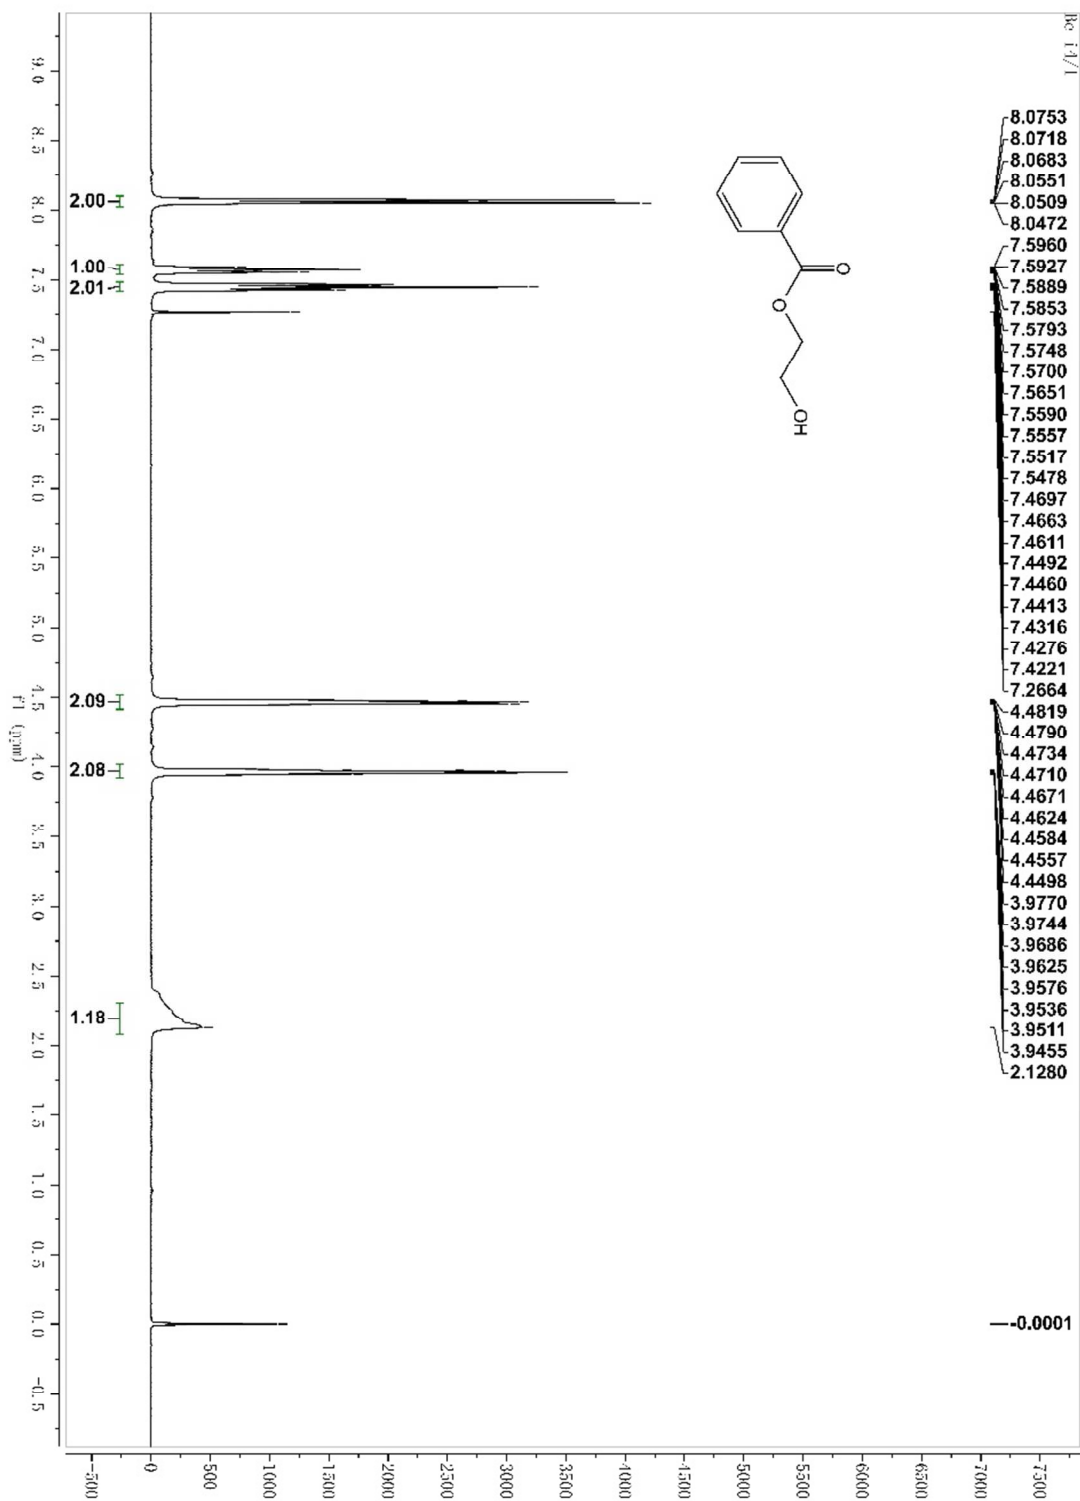

Supplement: Supplementary file 1 [file 5520149]
